# Supplementary material
Source: ML conference proceedings conference paper supplement (https://openaccess.thecvf.com/content/ICCV2023/html/Dong_Large-Scale_Land_Cover_ICCV_2023_paper.html)
Supplement: Supplementary file 1 [file Dong_Large-Scale_Land_Cover_ICCV_2023_supplemental.pdf]

# Supplementary Material for Large-Scale Land Cover Mapping with Fine-Grained Classes via Class-Aware Semi-Supervised Semantic Segmentation

Runmin Dong<sup>1,4</sup>, Lichao Mou<sup>2</sup>, Mengxuan Chen<sup>1,4</sup>, Weijia Li<sup>3</sup>, Xin-Yi Tong<sup>2</sup>,  
Shuai Yuan<sup>1,4</sup>, Lixian Zhang<sup>1,4</sup>, Juepeng Zheng<sup>3,4</sup>, Xiao Xiang Zhu<sup>2</sup>, Haohuan Fu<sup>1,4,\*</sup>  
<sup>1</sup>Tsinghua University <sup>2</sup>Technical University of Munich <sup>3</sup>Sun Yat-Sen University  
<sup>4</sup>Tsinghua University - Xi'an Institute of Surveying and Mapping Joint Research Center  
drm@mail.tsinghua.edu.cn, haohuan@tsinghua.edu.cn

## 1. Visual Comparison Results

We give visual comparison examples of two typical minority classes, *i.e.*, *fish pond* and *garden land*. Figure 1 shows the visual comparison results of the fish pond area. Our method exhibits superior discriminative capability between fish ponds and paddy fields compared to the competing methods. Figure 2 shows the visual comparison results of the garden land area. Our method alleviates the confusion between garden land and arbor forest compared to the competing methods.

Baseline and competing methods (c)-(h) misclassify fish ponds to paddy fields and confuse garden land and arbor forest, while our method alleviates these issues. Compared to the baseline, Pseudo-labeling [2], Advent [4], and DPA [3] aggravate the confusion because these methods tend to predict majority classes and neglect the learning of minority classes. Since CADR [1] uses a sample re-weighting method and dynamically decreases the pseudo-label assignment threshold for minority classes, it can partly alleviate the misclassification. However, it does not consider the class imbalance issue on the entire training dataset. Our method exhibits the superior discriminative capability of minority classes compared to the competing methods.

## References

- [1] Xinting Hu, Yulei Niu, Chunyan Miao, Xian-Sheng Hua, and Hanwang Zhang. On non-random missing labels in semi-supervised learning. In *International Conference on Learning Representations*, 2022.
- [2] Dong-Hyun Lee et al. Pseudo-label: The simple and efficient semi-supervised learning method for deep neural networks. In *Workshop on challenges in representation learning, International Conference on Machine Learning*, volume 3, page 896, 2013.
- [3] Xin-Yi Tong, Gui-Song Xia, and Xiao Xiang Zhu. Enabling country-scale land cover mapping with meter-resolution satellite imagery. *ISPRS Journal of Photogrammetry and Remote Sensing*, 196:178–196, 2023.
- [4] Tuan-Hung Vu, Himalaya Jain, Maxime Bucher, Matthieu Cord, and Patrick Pérez. Advent: Adversarial entropy minimization for domain adaptation in semantic segmentation. In *Proceedings of the IEEE/CVF Conference on Computer Vision and Pattern Recognition*, pages 2517–2526, 2019.

---

\*Corresponding author

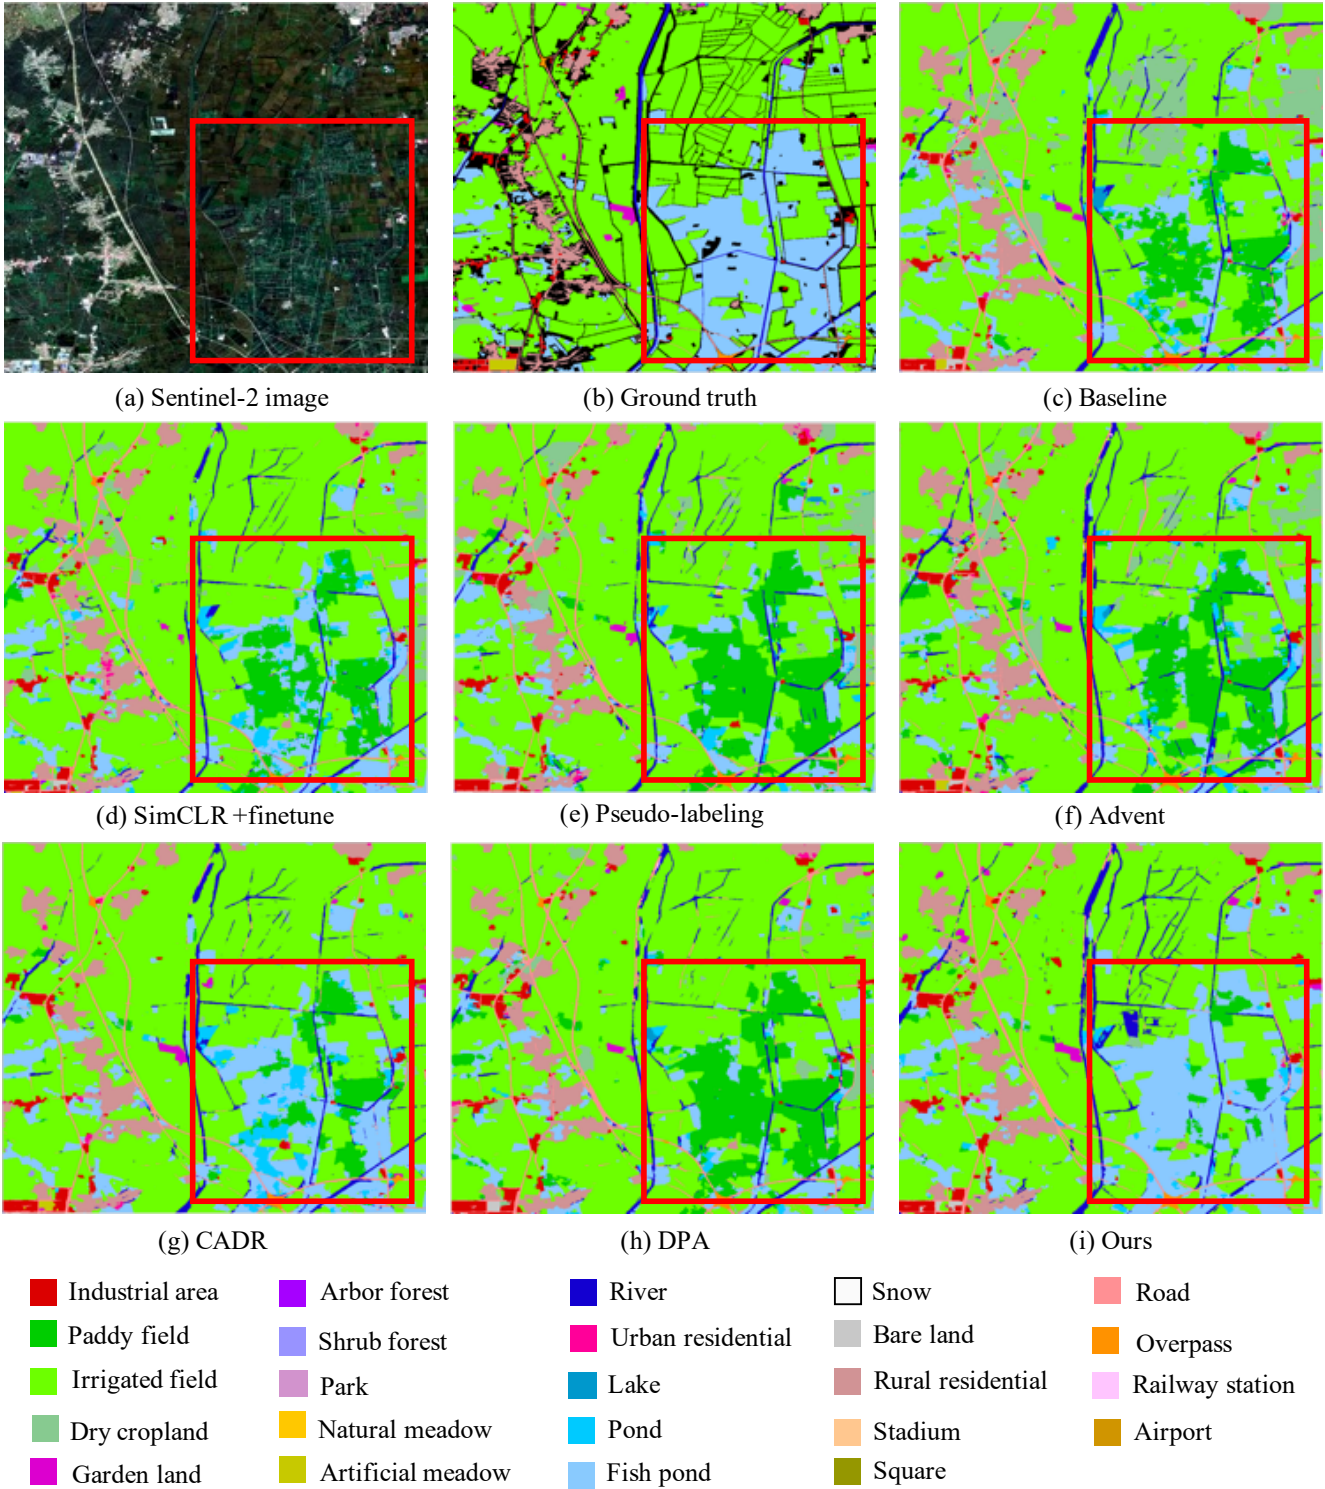

Figure 1. Visual comparison results of the area encompassing fish ponds. Baseline and competing methods (c)-(h) misclassify fish ponds into paddy fields. Our method exhibits superior discriminative capability between fish ponds and paddy fields compared to the competing methods.

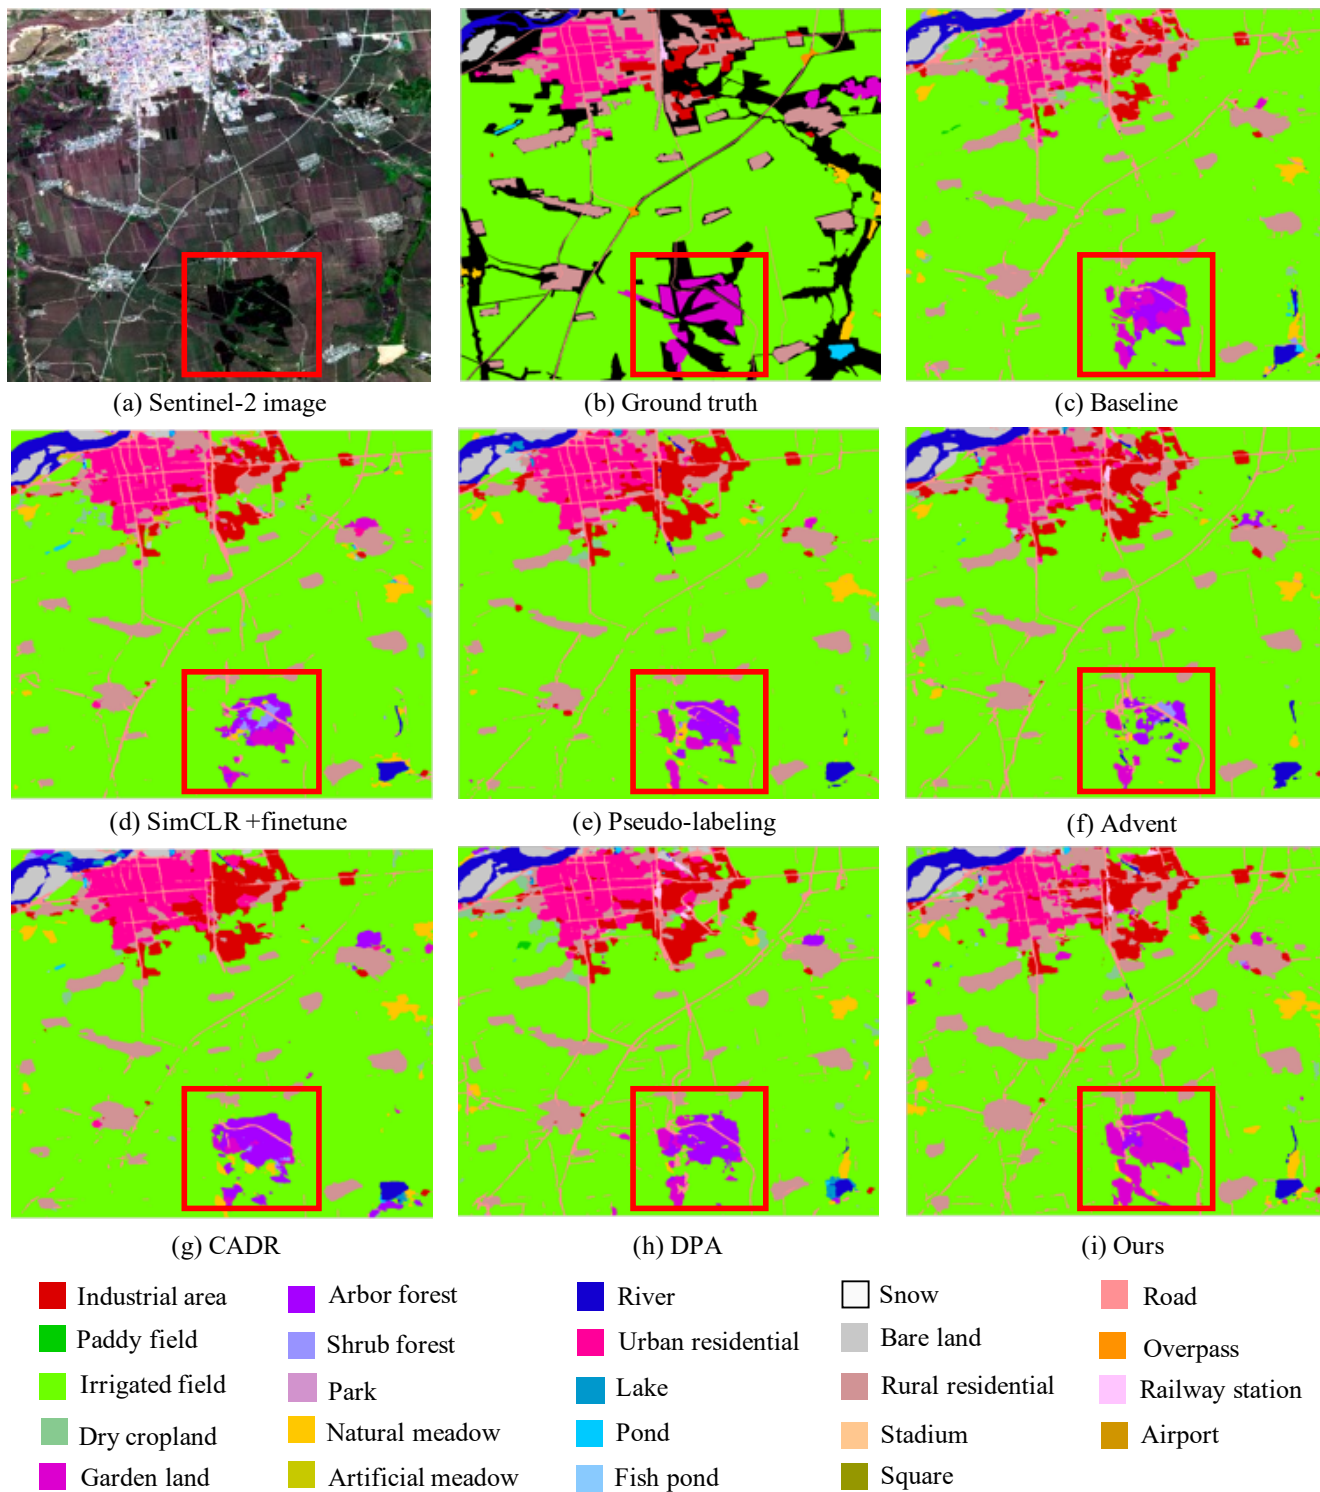

Figure 2. Visual comparison results of the area encompassing garden land. Baseline and competing methods (c)-(h) confuse garden land and arbor forest. Our method alleviates the confusion between garden land and arbor forest compared to the competing methods.
